# Supplementary material for: Reaching beyond HIV/HCV: nelfinavir as a potential starting point for broad-spectrum protease inhibitors against dengue and chikungunya virus
Source: Royal Society of Chemistry journal article supplement (doi:10.1039/c5ra14469h), 2015-01-01
Supplement: c5ra14469h1.pdf [file c5ra14469h1.pdf]

## Supplementary Informations 1

### **Reaching beyond HIV/HCV: Nelfinavir as a potential starting point for broad-spectrum protease inhibitors against dengue and chikungunya virus**

Soumendranath Bhakat<sup>a\*</sup>, Leen Delang<sup>c</sup>, Suzanne Kaptein<sup>c</sup>, Johan Neyts<sup>c\*</sup>, Pieter Leyssen<sup>c</sup>, Venkatesan Jayaprakash<sup>b\*</sup>

<sup>a</sup> Division of Biophysical Chemistry, Lund University, P.O. Box 124, SE-22100 Lund, Sweden

<sup>b</sup> Department of Pharmaceutical Sciences, Birla Institute of Technology, Mesra-835215, India

<sup>c</sup> KU Leuven - University of Leuven, Rega Institute for Medical Research, B-3000 Leuven, Belgium

\*Corresponding authors

Soumendranath Bhakat; email: [soumendranath.bhakat@bpc.lu.se](mailto:soumendranath.bhakat@bpc.lu.se)

Venkatesan Jayaprakash; email: [venkatesanj@bitmesra.ac.in](mailto:venkatesanj@bitmesra.ac.in)

[Johan Neyts; email: johan.neyts@rega.kuleuven.be](mailto:johan.neyts@rega.kuleuven.be)

Active site identification of CHIKV NSP2 (PDB: 3TRK)

Output from SiteHound Web (<http://scbx.mssm.edu/sitehound/sitehound-web/Input.html>)

CYS 1013 A  
TRP 1014 A  
LYS 1045 A  
ALA 1046 A  
TYR 1047 A  
SER 1048 A  
VAL 1051 A  
TYR 1079 A  
ASN 1082 A  
TRP 1084 A  
LEU 1203 A  
GLU 1204 A  
LEU 1205 A  
GLY 1206 A  
ALA 1237 A  
LYS 1239 A  
GLN 1241 A  
LEU 1243 A  
ASP 1246 A

Output from MetaPocket (<http://projects.biotec.tu-dresden.de/metapocket/>)

|             |             |             |             |             |
|-------------|-------------|-------------|-------------|-------------|
| RESI        | ALA_A^1010^ | ASN_A^1011^ | CYS_A^1013^ | ASN_A^1082^ |
| HIS_A^1083^ |             |             |             |             |
| RESI        | TYR_A^1079^ | TRP_A^1084^ | VAL_A^1012^ | TRP_A^1014^ |
| ASP_A^1081^ |             |             |             |             |
| RESI        | LEU_A^1205^ | TYR_A^1047^ | ALA_A^1046^ | SER_A^1048^ |
| PRO_A^1049^ |             |             |             |             |

```

RESI      GLU_A^1204^  ASN_A^1202^  ASP_A^1044^  LYS_A^1045^
GLY_A^1206^
RESI      ASP_A^1246^  LEU_A^1207^  GLN_A^1241^  LEU_A^1203^
VAL_A^1051^
RESI      GLY_A^1245^  LEU_A^1243^  LEU_A^1192^  PRO_A^1191^
ALA_A^1040^
RESI      LYS_A^1239^  THR_A^1268^  ALA_A^1237^  GLY_A^1244^
GLU_A^1055^
RESI      ILE_A^1038^  GLN_A^1039^  ASP_A^1235^  LEU_A^1240^
GLU_A^1043^
RESI      ILE_A^1037^  VAL_A^1234^  HIS_A^1236^  GLN_A^1231^
ILE_A^1221^
RESI      ARG_A^1226^  THR_A^1223^  PRO_A^1224^  HIS_A^1222^
PHE_A^1225^
RESI      VAL_A^1272^  ASP_A^1266^  SER_A^1269^  CYS_A^1233^
GLY_A^1176^
RESI      ASN_A^1220^  TYR_A^1177^  GLU_A^1050^  LYS_A^1091^
ARG_A^1271^
RESI      ARG_A^1267^

```

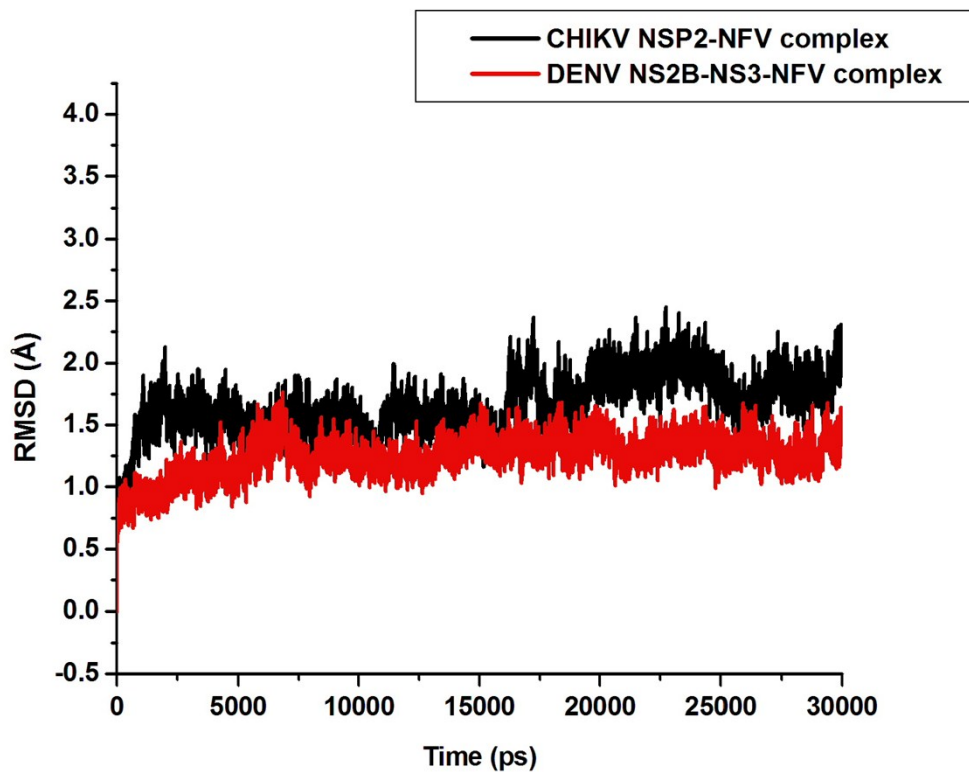

**Figure S1.** C- $\alpha$  RMSD fluctuation of CHIKV NSP2 and DENV NS2B-NS3 complexed with NFV during simulation time.

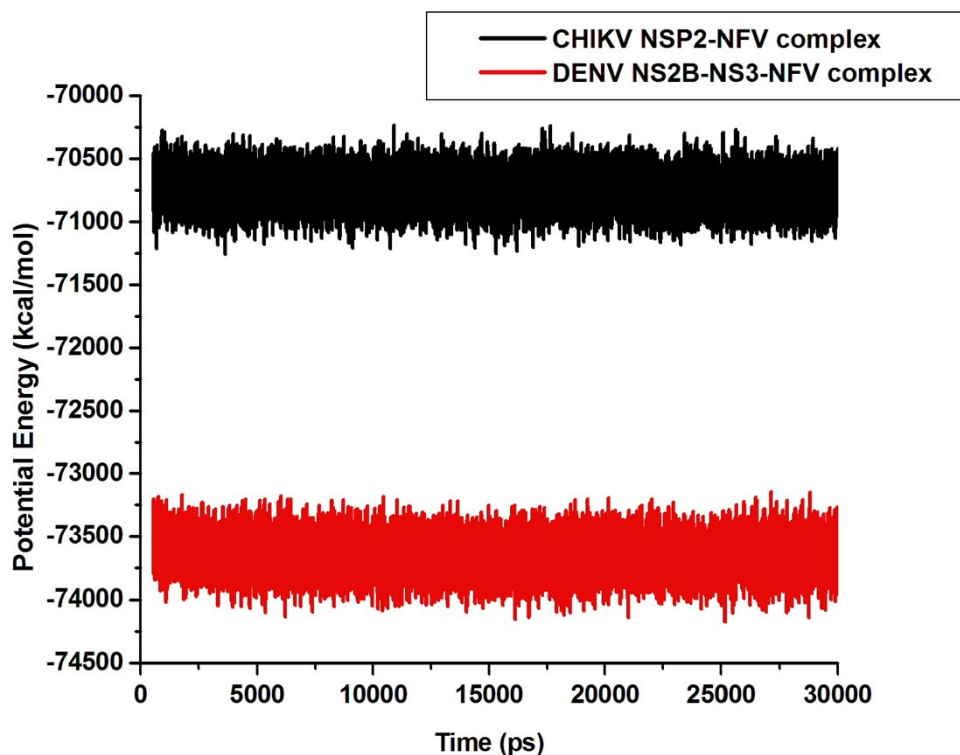

**Figure S2.** Potential energy fluctuation of CHIKV NSP2 and DENV NS2B-NS3 complexed with NFV during simulation time.

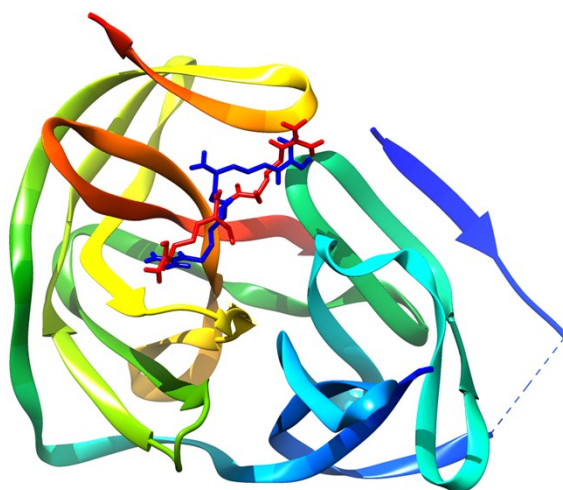

**Figure S3.** Redocking of the peptide inhibitor in the active site of DENV NS2B-NS3 protease. The co-crystal and docked ligand is highlighted in red and blue respectively. Due to its linear shape and peptide nature it is hard to derive a similar binding pose using molecular docking but its binding in almost similar cavity in proximity with the co-crystal ligand gives solid credibility to the preciseness of the docking.
